# Supplementary material for: Different Genetic Sources Contribute to the Small RNA Population in the Arbuscular Mycorrhizal Fungus Gigaspora margarita
Source: Front Microbiol. 2020 Mar 13;11:395. doi: 10.3389/fmicb.2020.00395 (PMC7082362; doi:10.3389/fmicb.2020.00395)
Supplement: Supplementary file 12 [file Data_Sheet_6.csv]

#Supplementary Data Sheet 6: Results of target prediction in Medicago truncatula trascriptome for Gigaspora margarita viral-mapped small RNAs (psRNAtarget)
miRNA_Acc.	Target_Acc.	Expectation	UPE.	miRNA_start	miRNA_end	Target_start	Target_end	miRNA_aligned_fragment	Target_aligned_fragment	Inhibition	Multiplicity	Description	miRNA_seq	miRNA_len	Mitovirus
10-10135	KEH19127	2.5	-1	1	21	541	561	ACCCUCAUGGUCGAUCGACCG	UUGUUGCUUGAUCAUGAGGGU	Cleavage	1	Serine/Threonine-kinase_aurora-like_protein	ACCCTCATGGTCGATCGACCG	21	Mitovirus1
10-10135	AET02155	2	-1	1	21	556	576	ACCCUCAUGGUCGAUCGACCG	CUGUUGCUUGACCAUGAGGGU	Cleavage	1	Serine/Threonine-kinase_aurora-like_protein	ACCCTCATGGTCGATCGACCG	21	Mitovirus1
117-792	KEH25454	2.5	-1	1	21	212	232	GGAAGAGAACGAGAAUCGGCG	UCUCGAUUCUCGUUCUCAUUC	Cleavage	1	P-loop_nucleoside_triphosphate_hydrolase_superfamily_protein	GGAAGAGAACGAGAATCGGCG	21	Mitovirus1
117-792	KEH16602	3	-1	1	21	1278	1298	GGAAGAGAACGAGAAUCGGCG	AUUCGAUUUUUGUUUUCUUUU	Cleavage	1	activator_of_90_kDa_heat_shock_ATPase-like_protein	GGAAGAGAACGAGAATCGGCG	21	Mitovirus1
117-792	AES61125	3	-1	1	21	38	58	GGAAGAGAACGAGAAUCGGCG	UUCUCAUUCUUGUUUUCUUCU	Cleavage	1	phloem_protein_2-B11	GGAAGAGAACGAGAATCGGCG	21	Mitovirus1
117-792	AES72328	3	-1	1	21	516	536	GGAAGAGAACGAGAAUCGGCG	AACUGAUUCUCCUUCUUUUCU	Translation	1	4-coumarate	GGAAGAGAACGAGAATCGGCG	21	Mitovirus1
117-792	AES67223	3	-1	1	21	87	107	GGAAGAGAACGAGAAUCGGCG	GACUGUUUCUCGUUCUCUUGC	Cleavage	1	phenylpropenal_double-bond_reductase	GGAAGAGAACGAGAATCGGCG	21	Mitovirus1
117-792	AES91183	3	-1	1	21	285	305	GGAAGAGAACGAGAAUCGGCG	GUUUGAUUCUCUUUCUCUUUC	Translation	1	homeobox_leucine_zipper_family_protein	GGAAGAGAACGAGAATCGGCG	21	Mitovirus1
117-792	KEH36395	3	-1	1	21	1530	1550	GGAAGAGAACGAGAAUCGGCG	ACCCGAAUCUCGUUUUGUUCC	Cleavage	1	UTP-glucose-1-phosphate_uridylyltransferase	GGAAGAGAACGAGAATCGGCG	21	Mitovirus1
117-792	KEH31057	3	-1	1	21	416	436	GGAAGAGAACGAGAAUCGGCG	UUUUGAUUUUUGUUUUCUUUC	Cleavage	1	tyrosine_kinase_family_protein	GGAAGAGAACGAGAATCGGCG	21	Mitovirus1
117-792	KEH24293	3	-1	1	21	149	169	GGAAGAGAACGAGAAUCGGCG	AUUCGAUUUUCGUUCUUUUAC	Cleavage	1	transducin_family_protein/WD-40_repeat_protein	GGAAGAGAACGAGAATCGGCG	21	Mitovirus1
117-792	AES61123	3	-1	1	21	83	103	GGAAGAGAACGAGAAUCGGCG	CUCUCAUUCUUGUUUUCUUCU	Cleavage	1	phloem_protein_2-B11	GGAAGAGAACGAGAATCGGCG	21	Mitovirus1
117-792	AES67965	3	-1	1	21	44	64	GGAAGAGAACGAGAAUCGGCG	ACACAGUUCUCGUUCUCUUCU	Cleavage	1	hypothetical_protein	GGAAGAGAACGAGAATCGGCG	21	Mitovirus1
117-792	AES66101	2.5	-1	1	21	696	716	GGAAGAGAACGAGAAUCGGCG	AACUGAUUCUCAUUCUUUUCC	Translation	1	glycoside_hydrolase_family_20_domain_protein	GGAAGAGAACGAGAATCGGCG	21	Mitovirus1
117-792	AES74324	3	-1	1	21	1536	1556	GGAAGAGAACGAGAAUCGGCG	ACCCGAAUCUCGUUUUGUUCC	Cleavage	1	UTP-glucose-1-phosphate_uridylyltransferase	GGAAGAGAACGAGAATCGGCG	21	Mitovirus1
117-792	KEH38957	3	-1	1	21	140	160	GGAAGAGAACGAGAAUCGGCG	CAUUGAUUUUCCUUCUCUUCC	Translation	1	DUF868_family_protein	GGAAGAGAACGAGAATCGGCG	21	Mitovirus1
117-792	AES71997	3	-1	1	21	98	118	GGAAGAGAACGAGAAUCGGCG	CAUCCAUCCUUGUUCUCUUCC	Cleavage	1	15-cis-zeta-carotene_isomerase	GGAAGAGAACGAGAATCGGCG	21	Mitovirus1
117-792	AET04633	3	-1	1	21	107	127	GGAAGAGAACGAGAAUCGGCG	UCUCGGUUCUUGUUCUUUUUU	Cleavage	1	transmembrane_protein;_putative	GGAAGAGAACGAGAATCGGCG	21	Mitovirus1
117-792	AES98399	3	-1	1	21	1031	1051	GGAAGAGAACGAGAAUCGGCG	UUUUGUUUCUUGUUCUUUUCC	Cleavage	1	DUF3133_family_protein	GGAAGAGAACGAGAATCGGCG	21	Mitovirus1
117-792	KEH28339	3	-1	1	21	2114	2134	GGAAGAGAACGAGAAUCGGCG	UUCUAGUUUUUGUUCUCUUCC	Cleavage	1	BTB/POZ/MATH-domain_protein	GGAAGAGAACGAGAATCGGCG	21	Mitovirus1
117-792	KEH41693	3	-1	1	21	333	353	GGAAGAGAACGAGAAUCGGCG	UUCUGGUUCUUGUUUUCUUCA	Cleavage	1	myb-like_transcription_factor_family_protein	GGAAGAGAACGAGAATCGGCG	21	Mitovirus1
117-792	KEH43349	3	-1	1	21	727	747	GGAAGAGAACGAGAAUCGGCG	ACACGAUUUUUGUUCUUUUCU	Cleavage	1	hypothetical_protein	GGAAGAGAACGAGAATCGGCG	21	Mitovirus1
117-792	KEH29692	3	-1	1	21	812	832	GGAAGAGAACGAGAAUCGGCG	UUCUGAUUCUCGUUCAUUUUC	Cleavage	1	gaba-receptor-associated_protein_ubiquitin_domain_protein	GGAAGAGAACGAGAATCGGCG	21	Mitovirus1
117-792	AES98059	2	-1	1	21	185	205	GGAAGAGAACGAGAAUCGGCG	CUUCGAUUUUCGUUUUCUUUC	Cleavage	1	myosin_heavy_chain-like_protein	GGAAGAGAACGAGAATCGGCG	21	Mitovirus1
117-792	KEH19034	3	-1	1	21	33	53	GGAAGAGAACGAGAAUCGGCG	CUCCGCUUCUUGCUCUCUUCC	Cleavage	1	4-hydroxy-tetrahydrodipicolinate_synthase	GGAAGAGAACGAGAATCGGCG	21	Mitovirus1
117-792	AET04736	3	-1	1	21	134	154	GGAAGAGAACGAGAAUCGGCG	AGCCGAUCAUCGUUUUCUUCC	Cleavage	1	plant_NAC_domain_protein	GGAAGAGAACGAGAATCGGCG	21	Mitovirus1
117-792	AES95755	3	-1	1	21	1641	1661	GGAAGAGAACGAGAAUCGGCG	UGGUGAUUCUGGUUCUCUUCC	Translation	1	cellulose_synthase-like_protein	GGAAGAGAACGAGAATCGGCG	21	Mitovirus1
117-792	AES90002	3	-1	1	21	62	82	GGAAGAGAACGAGAAUCGGCG	CUUCCAUUCUCGUUCCCUUCC	Cleavage	1	SPFH_domain/band_7_family_protein	GGAAGAGAACGAGAATCGGCG	21	Mitovirus1
117-792	KEH44034	3	-1	1	21	192	212	GGAAGAGAACGAGAAUCGGCG	UUCCGAUUCUCCUCCUCUUCC	Translation	1	transporter-like_protein;_putative	GGAAGAGAACGAGAATCGGCG	21	Mitovirus1
120-757	KEH16040	3	-1	1	21	2060	2080	GCCGGAUUUCGUUUAAAGACG	AAGCUUUAACUGAAAUCCGGC	Cleavage	1	LRR_receptor-like_kinase_family_protein	GCCGGATTTCGTTTAAAGACG	21	Mitovirus1
120-757	KEH25011	3	-1	1	21	2335	2355	GCCGGAUUUCGUUUAAAGACG	AGUUUUUUAACGAAGUUUGGC	Cleavage	1	reticulon-like_protein_B2	GCCGGATTTCGTTTAAAGACG	21	Mitovirus1
120-757	KEH15981	3	-1	1	21	1985	2005	GCCGGAUUUCGUUUAAAGACG	AAGCUUUAACUGAAAUCCGGC	Cleavage	1	LRR_receptor-like_kinase_family_protein	GCCGGATTTCGTTTAAAGACG	21	Mitovirus1
131-708	KEH44448	2.5	-1	1	21	159	179	AACGAGAAUCGGCGGCCUGCG	UUGAUGCCGUCGAUUCUCGUU	Cleavage	1	high_mobility_group_(HMG)-box_protein	AACGAGAATCGGCGGCCTGCG	21	Mitovirus1
131-708	AES94704	3	-1	1	21	122	142	AACGAGAAUCGGCGGCCUGCG	UUCAAGUCGUUGGUUCUCGUU	Cleavage	1	arginine/serine-rich_splicing_factor	AACGAGAATCGGCGGCCTGCG	21	Mitovirus1
133-704	AES96478	3	-1	1	21	68	88	AGAGAACGAGAAUCGGCGGCC	CUCCGUUUAUUUUUGUUCUCU	Cleavage	1	small_multi-drug_export_protein;_putative	AGAGAACGAGAATCGGCGGCC	21	Mitovirus1
133-704	AES89714	2.5	-1	1	21	422	442	AGAGAACGAGAAUCGGCGGCC	AGGCGCUGAUUUUCGUUUUCU	Cleavage	1	hypothetical_protein	AGAGAACGAGAATCGGCGGCC	21	Mitovirus1
133-704	AES61795	3	-1	1	21	143	163	AGAGAACGAGAAUCGGCGGCC	GUGCGCUGAUUCUCUUUCUCU	Cleavage	1	E3_ubiquitin-protein_ligase_BAH1-like_protein;_putative	AGAGAACGAGAATCGGCGGCC	21	Mitovirus1
133-704	KEH34075	3	-1	1	21	644	664	AGAGAACGAGAAUCGGCGGCC	UCAUGCUGAUUCUUGUUUUCU	Cleavage	1	transmembrane_protein;_putative	AGAGAACGAGAATCGGCGGCC	21	Mitovirus1
133-704	AES94572	2.5	-1	1	21	289	309	AGAGAACGAGAAUCGGCGGCC	ACCCACUCAUUCUCGUUCUCU	Cleavage	1	lateral_organ_boundaries_(LOB)_domain_protein	AGAGAACGAGAATCGGCGGCC	21	Mitovirus1
133-704	AES73883	3	-1	1	21	3585	3605	AGAGAACGAGAAUCGGCGGCC	CUUUGCUGAUUUUCGUUUUUU	Cleavage	1	LRR_receptor-like_kinase	AGAGAACGAGAATCGGCGGCC	21	Mitovirus1
133-704	KEH32333	3	-1	1	21	130	150	AGAGAACGAGAAUCGGCGGCC	CUCUUCCGAUUCUCUUUCUCU	Cleavage	1	GATA_type_zinc_finger_transcription_factor_family_protein	AGAGAACGAGAATCGGCGGCC	21	Mitovirus1
133-704	AES94704	3	-1	1	21	126	146	AGAGAACGAGAAUCGGCGGCC	AGUCGUUGGUUCUCGUUCUCG	Cleavage	2	arginine/serine-rich_splicing_factor	AGAGAACGAGAATCGGCGGCC	21	Mitovirus1
189-528	AES80648	3	-1	1	21	337	357	UCUUCGAGCCGGAUAUAGACC	GUUCUCUAUCCGGUUUGAAGC	Cleavage	1	plant_integral_membrane_protein	TCTTCGAGCCGGATATAGACC	21	Mitovirus1
189-528	AES80647	3	-1	1	21	392	412	UCUUCGAGCCGGAUAUAGACC	GUUCUCUAUCCGGUUUGAAGC	Cleavage	1	plant_integral_membrane_protein	TCTTCGAGCCGGATATAGACC	21	Mitovirus1
201-515	KEH32906	2.5	-1	1	21	294	314	CCUCGGCGUACCCACACCCCC	AUGGGUGUGGGCAUGUCGAGG	Translation	1	hypothetical_protein	CCTCGGCGTACCCACACCCCC	21	Mitovirus1
204-506	KEH39309	3	-1	1	21	400	420	CGGGAUUGAAGGUGACCGGGA	ACUCGGUCUUCUUCAAUUCCG	Cleavage	1	vacuolar_proton_ATPase_a3-like_protein	CGGGATTGAAGGTGACCGGGA	21	Mitovirus1
204-506	AES68708	3	-1	1	21	951	971	CGGGAUUGAAGGUGACCGGGA	CUAUGGUCAUCUUCAAUUUCG	Cleavage	1	F-box_protein_interaction_domain_protein	CGGGATTGAAGGTGACCGGGA	21	Mitovirus1
204-506	KEH39308	3	-1	1	21	400	420	CGGGAUUGAAGGUGACCGGGA	ACUCGGUCUUCUUCAAUUCCG	Cleavage	1	vacuolar_proton_ATPase_a3-like_protein	CGGGATTGAAGGTGACCGGGA	21	Mitovirus1
204-506	KEH39307	3	-1	1	21	400	420	CGGGAUUGAAGGUGACCGGGA	ACUCGGUCUUCUUCAAUUCCG	Cleavage	1	vacuolar_proton_ATPase_a3-like_protein	CGGGATTGAAGGTGACCGGGA	21	Mitovirus1
204-506	AES67400	3	-1	1	21	409	429	CGGGAUUGAAGGUGACCGGGA	ACUCGGUCUUCUUCAAUUCCG	Cleavage	1	vacuolar_proton_ATPase_a3-like_protein	CGGGATTGAAGGTGACCGGGA	21	Mitovirus1
217-470	AES76423	2.5	-1	1	21	1968	1988	UCGAUUGUGGUUGAGUUUAUC	UGUGAAUUUAAUCACAGUCGA	Cleavage	1	disease_resistance_protein_(TIR-NBS-LRR_class)	TCGATTGTGGTTGAGTTTATC	21	Mitovirus1
217-470	AES70460	3	-1	1	21	193	213	UCGAUUGUGGUUGAGUUUAUC	GAUCAACUCAAUCACAAUCAA	Cleavage	1	EF-hand_pair_protein	TCGATTGTGGTTGAGTTTATC	21	Mitovirus1
217-470	AES82834	2.5	-1	1	21	63	83	UCGAUUGUGGUUGAGUUUAUC	AGUUAACUCAACCACUAUCGA	Cleavage	1	caffeic_acid_O-methyltransferase	TCGATTGTGGTTGAGTTTATC	21	Mitovirus1
217-470	AES74572	3	-1	1	21	56	76	UCGAUUGUGGUUGAGUUUAUC	AAUAAACUCAACAACAAUUGC	Cleavage	1	cytochrome_P450_family_protein	TCGATTGTGGTTGAGTTTATC	21	Mitovirus1
217-470	KEH26886	2.5	-1	1	21	2164	2184	UCGAUUGUGGUUGAGUUUAUC	UGUGAAUUUAAUCACAGUCGA	Cleavage	1	disease_resistance_protein_(TIR-NBS-LRR_class)	TCGATTGTGGTTGAGTTTATC	21	Mitovirus1
217-470	KEH34176	3	-1	1	21	626	646	UCGAUUGUGGUUGAGUUUAUC	UUUGGACUCAUCCACAAUCGG	Translation	1	hypothetical_protein	TCGATTGTGGTTGAGTTTATC	21	Mitovirus1
217-470	AES80322	3	-1	1	21	1158	1178	UCGAUUGUGGUUGAGUUUAUC	AUCAAAUUCAACUAUAGUCGA	Cleavage	1	subtilisin-like_serine_protease	TCGATTGTGGTTGAGTTTATC	21	Mitovirus1
217-470	KEH29353	3	-1	1	21	289	309	UCGAUUGUGGUUGAGUUUAUC	GAUUACCUCAAUCACAAUUGA	Cleavage	1	40S_ribosomal_protein_S20-2	TCGATTGTGGTTGAGTTTATC	21	Mitovirus1
217-470	AES99352	3	-1	1	21	1094	1114	UCGAUUGUGGUUGAGUUUAUC	AGAAAACACAAUCACAAUUGA	Cleavage	1	proteasome_subunit_beta_protein	TCGATTGTGGTTGAGTTTATC	21	Mitovirus1
217-470	KEH38163	3	-1	1	21	1496	1516	UCGAUUGUGGUUGAGUUUAUC	CUAAAGAUCAACUACAAUCGA	Cleavage	1	hypothetical_protein	TCGATTGTGGTTGAGTTTATC	21	Mitovirus1
217-470	AET04068	3	-1	1	21	1822	1842	UCGAUUGUGGUUGAGUUUAUC	GCUGAAUGCAAUCACAAUUGA	Cleavage	1	transcription_factor	TCGATTGTGGTTGAGTTTATC	21	Mitovirus1
217-470	KEH16517	3	-1	1	21	309	329	UCGAUUGUGGUUGAGUUUAUC	GAUUACCUCAAUCACAAUUGA	Cleavage	1	40S_ribosomal_protein_S20-2	TCGATTGTGGTTGAGTTTATC	21	Mitovirus1
217-470	AES87774	3	-1	1	21	484	504	UCGAUUGUGGUUGAGUUUAUC	GAUUACCUCAAUCACAAUUGA	Cleavage	1	40S_ribosomal_protein_S20-2	TCGATTGTGGTTGAGTTTATC	21	Mitovirus1
217-470	KEH41600	2.5	-1	1	21	3078	3098	UCGAUUGUGGUUGAGUUUAUC	ACUAAGUUUAAUCACAAUUGA	Cleavage	1	stress_up-regulated_Nod_19_protein	TCGATTGTGGTTGAGTTTATC	21	Mitovirus1
217-470	KEH20531	3	-1	1	21	1822	1842	UCGAUUGUGGUUGAGUUUAUC	GCUGAAUGCAAUCACAAUUGA	Cleavage	1	transcription_factor	TCGATTGTGGTTGAGTTTATC	21	Mitovirus1
217-470	AES88530	3	-1	1	21	473	493	UCGAUUGUGGUUGAGUUUAUC	UUUGGACUCAUCCACAAUCGG	Translation	1	hypothetical_protein	TCGATTGTGGTTGAGTTTATC	21	Mitovirus1
217-470	KEH41598	2.5	-1	1	21	3078	3098	UCGAUUGUGGUUGAGUUUAUC	ACUAAGUUUAAUCACAAUUGA	Cleavage	1	stress_up-regulated_Nod_19_protein	TCGATTGTGGTTGAGTTTATC	21	Mitovirus1
217-470	KEH34557	3	-1	1	21	198	218	UCGAUUGUGGUUGAGUUUAUC	UAGAAACUCAACCACAAGUGA	Cleavage	1	hypothetical_protein	TCGATTGTGGTTGAGTTTATC	21	Mitovirus1
254-399	AES76369	2	-1	1	21	1571	1591	GCGUUACAGAAAUUGGCCAUG	UUUGGCCAAUUUCUUUAAUGC	Cleavage	1	plastid_division_protein_CDP1	GCGTTACAGAAATTGGCCATG	21	Mitovirus1
254-399	AES98280	3	-1	1	21	3597	3617	GCGUUACAGAAAUUGGCCAUG	CAUGUUCGGUUUCUGUAAUGC	Cleavage	1	cytochrome_C_biogenesis_protein_ccsA;_putative	GCGTTACAGAAATTGGCCATG	21	Mitovirus1
255-396	AES82158	3	-1	1	21	1108	1128	CUCGUGGUAUCGUCUUGUGGA	UUUACAAGACGAUAUUGCGAA	Cleavage	1	CAZy_family_GT8_glycosyltransferase	CTCGTGGTATCGTCTTGTGGA	21	Mitovirus1
255-396	AES90250	3	-1	1	21	25	45	CUCGUGGUAUCGUCUUGUGGA	UUUACAAAACGAUACCAUGAA	Cleavage	1	maternal_effect_embryo_arrest_protein;_putative	CTCGTGGTATCGTCTTGTGGA	21	Mitovirus1
255-396	KEH29852	3	-1	1	21	1022	1042	CUCGUGGUAUCGUCUUGUGGA	GACACAAGACGAUAUGGUGAG	Cleavage	1	Sec23/Sec24_transport_family_protein	CTCGTGGTATCGTCTTGTGGA	21	Mitovirus1
255-396	AES90249	3	-1	1	21	25	45	CUCGUGGUAUCGUCUUGUGGA	UUUACAAAACGAUACCAUGAA	Cleavage	1	maternal_effect_embryo_arrest_protein;_putative	CTCGTGGTATCGTCTTGTGGA	21	Mitovirus1
255-396	AES63473	3	-1	1	21	969	989	CUCGUGGUAUCGUCUUGUGGA	AACAUAUGAUGAUAUCAUGAG	Cleavage	1	splicing_factor_3B_subunit;_putative	CTCGTGGTATCGTCTTGTGGA	21	Mitovirus1
255-396	KEH38771	3	-1	1	21	948	967	CUCGUGGUAUCGUCUUGUGGA	UCCAUA-GACGAUACCAUGAG	Cleavage	1	NADPH-protochlorophyllide_oxidoreductase	CTCGTGGTATCGTCTTGTGGA	21	Mitovirus1
270-381	KEH18983	2.5	-1	1	21	358	378	UGGACGUUUCGGGCUUCCCCU	AGGAGAGGCCCGAAAUGUUCA	Cleavage	1	ubiquitin-related_modifier_1	TGGACGTTTCGGGCTTCCCCT	21	Mitovirus1
306-338	AES70689	3	-1	1	21	443	463	ACGAGAAUCGGCGGCCUGCGA	UUGUAGGUUGCUGGUUUUCGU	Cleavage	1	transmembrane_protein;_putative	ACGAGAATCGGCGGCCTGCGA	21	Mitovirus1
309-334	KEH25005	2.5	-1	1	21	657	677	CAAGCCUCGGGAUUGUCGGUA	UGCCGAAGAUCCCGAGGCUUU	Cleavage	1	light-harvesting_complex_I_chlorophyll_A/B-binding_protein	CAAGCCTCGGGATTGTCGGTA	21	Mitovirus1
309-334	KEH25006	2.5	-1	1	21	656	676	CAAGCCUCGGGAUUGUCGGUA	UGCCGAAGAUCCCGAGGCUUU	Cleavage	1	light-harvesting_complex_I_chlorophyll_A/B-binding_protein	CAAGCCTCGGGATTGTCGGTA	21	Mitovirus1
365-282	KEH15652	3	-1	1	21	2673	2693	GUCCCAGUCUAAGGUGUUCUG	UUGAACAUCUUAGACUGGAAA	Cleavage	1	NB-ARC_domain_disease_resistance_protein	GTCCCAGTCTAAGGTGTTCTG	21	Mitovirus1
365-282	AET00275	3	-1	1	21	2227	2247	GUCCCAGUCUAAGGUGUUCUG	AUGAAUUACUUAGACUGGGAU	Cleavage	1	MATE_family_efflux_protein	GTCCCAGTCTAAGGTGTTCTG	21	Mitovirus1
365-282	KEH34462	2.5	-1	1	21	2700	2720	GUCCCAGUCUAAGGUGUUCUG	AAGAAGAUCUUGGACUGGGAU	Cleavage	1	insulin-degrading_enzyme	GTCCCAGTCTAAGGTGTTCTG	21	Mitovirus1
365-282	KEH42104	3	-1	1	21	5697	5717	GUCCCAGUCUAAGGUGUUCUG	AUGGAUUCUUUAGACUGGGAU	Cleavage	1	endonuclease/exonuclease/phosphatase_family_protein	GTCCCAGTCTAAGGTGTTCTG	21	Mitovirus1
38-2112	KEH39324	3	-1	1	21	754	774	CCGAAGCAAGAUCGCCGCGCG	GGUGUGGUGAUUUUGUUUUGG	Cleavage	1	galactose_oxidase/kelch_repeat_protein	CCGAAGCAAGATCGCCGCGCG	21	Mitovirus1
38-2112	AES98188	3	-1	1	21	146	166	CCGAAGCAAGAUCGCCGCGCG	GCAACGGCGGUUUUGCUUCGG	Cleavage	1	homeobox_domain;_ZF-HD_class_protein	CCGAAGCAAGATCGCCGCGCG	21	Mitovirus1
382-273	AES92246	3	-1	1	21	1639	1659	CCGCUUUUGCUCUGACGCACC	AUUGCAUCGGAUCAAAAGCGG	Translation	1	alpha-L-fucosidase	CCGCTTTTGCTCTGACGCACC	21	Mitovirus1
382-273	AES64555	3	-1	1	21	510	530	CCGCUUUUGCUCUGACGCACC	CCUGCAUGAGGGCAAAAGUGG	Cleavage	1	nodulin_MtN21/EamA-like_transporter_family_protein	CCGCTTTTGCTCTGACGCACC	21	Mitovirus1
382-273	KEH15602	3	-1	1	21	239	259	CCGCUUUUGCUCUGACGCACC	UCUGGGUCAGGGCAAAAGUGU	Cleavage	1	hypothetical_protein	CCGCTTTTGCTCTGACGCACC	21	Mitovirus1
382-273	AES77175	3	-1	1	21	1657	1677	CCGCUUUUGCUCUGACGCACC	UCUUUGACAGAGCAAAAGUGG	Cleavage	1	NAC_transcription_factor-like_protein	CCGCTTTTGCTCTGACGCACC	21	Mitovirus1
430-244	KEH43550	2.5	-1	1	21	860	880	CGUGGUAUCGUCUUGUGGAAG	GUUCCACAGGGUGAUGCCAUG	Cleavage	1	caffeic_acid_O-methyltransferase	CGTGGTATCGTCTTGTGGAAG	21	Mitovirus1
430-244	AES90250	3	-1	1	21	23	43	CGUGGUAUCGUCUUGUGGAAG	AAUUUACAAAACGAUACCAUG	Cleavage	1	maternal_effect_embryo_arrest_protein;_putative	CGTGGTATCGTCTTGTGGAAG	21	Mitovirus1
430-244	KEH26259	3	-1	1	21	560	580	CGUGGUAUCGUCUUGUGGAAG	UUUUCAAAGGACGAUACUAUG	Cleavage	1	albumin-2_protein	CGTGGTATCGTCTTGTGGAAG	21	Mitovirus1
430-244	AES64616	3	-1	1	21	1365	1385	CGUGGUAUCGUCUUGUGGAAG	ACCCUACAAGACCAUACCACG	Cleavage	1	zinc_finger;_C3HC4_type_(RING_finger)_protein	CGTGGTATCGTCTTGTGGAAG	21	Mitovirus1
430-244	AES78460	3	-1	1	21	232	252	CGUGGUAUCGUCUUGUGGAAG	GGUCCACCAGACGAUGUUAUG	Cleavage	1	hypothetical_protein	CGTGGTATCGTCTTGTGGAAG	21	Mitovirus1
430-244	AES90249	3	-1	1	21	23	43	CGUGGUAUCGUCUUGUGGAAG	AAUUUACAAAACGAUACCAUG	Cleavage	1	maternal_effect_embryo_arrest_protein;_putative	CGTGGTATCGTCTTGTGGAAG	21	Mitovirus1
430-244	AES82158	2.5	-1	1	21	1106	1126	CGUGGUAUCGUCUUGUGGAAG	GUUUUACAAGACGAUAUUGCG	Cleavage	1	CAZy_family_GT8_glycosyltransferase	CGTGGTATCGTCTTGTGGAAG	21	Mitovirus1
430-244	KEH26268	3	-1	1	21	603	623	CGUGGUAUCGUCUUGUGGAAG	UCUUCAAAGGACGAUACUAUG	Cleavage	1	albumin-2_protein	CGTGGTATCGTCTTGTGGAAG	21	Mitovirus1
457-230	AES91043	3	-1	1	21	927	947	CAUGGUCGACUACUGGACGCA	UUCGUUUGGUAGUCGAACAUG	Cleavage	1	uridine_kinase/uracil_phosphoribosyltransferase	CATGGTCGACTACTGGACGCA	21	Mitovirus1
466-226	KEH26124	3	-1	1	21	800	820	AAGAGAACGAGAAUCGGCGGC	UUUGUUGUUUCUUGUUCUCUU	Cleavage	1	Kunitz_type_trypsin_inhibitor_/_Alpha-fucosidase	AAGAGAACGAGAATCGGCGGC	21	Mitovirus1
466-226	KEH38641	3	-1	1	21	1096	1116	AAGAGAACGAGAAUCGGCGGC	AGUGUUGUUUCUUGUUCUCUU	Cleavage	1	calmodulin-binding_protein	AAGAGAACGAGAATCGGCGGC	21	Mitovirus1
466-226	AES61795	2	-1	1	21	144	164	AAGAGAACGAGAAUCGGCGGC	UGCGCUGAUUCUCUUUCUCUU	Cleavage	1	E3_ubiquitin-protein_ligase_BAH1-like_protein;_putative	AAGAGAACGAGAATCGGCGGC	21	Mitovirus1
466-226	AES69017	3	-1	1	21	716	736	AAGAGAACGAGAAUCGGCGGC	AUGGCUGGUUUUCGUUCUUUU	Cleavage	1	short-chain_dehydrogenase/reductase	AAGAGAACGAGAATCGGCGGC	21	Mitovirus1
466-226	AES98059	2.5	-1	1	21	183	203	AAGAGAACGAGAAUCGGCGGC	CACUUCGAUUUUCGUUUUCUU	Cleavage	1	myosin_heavy_chain-like_protein	AAGAGAACGAGAATCGGCGGC	21	Mitovirus1
466-226	AES89714	1.5	-1	1	21	423	443	AAGAGAACGAGAAUCGGCGGC	GGCGCUGAUUUUCGUUUUCUU	Cleavage	1	hypothetical_protein	AAGAGAACGAGAATCGGCGGC	21	Mitovirus1
466-226	AES99231	2.5	-1	1	21	974	994	AAGAGAACGAGAAUCGGCGGC	GGUGUUGAUUCUUGUUCUUUU	Cleavage	1	LRR_receptor-like_kinase	AAGAGAACGAGAATCGGCGGC	21	Mitovirus1
466-226	AES73883	2.5	-1	1	21	3586	3606	AAGAGAACGAGAAUCGGCGGC	UUUGCUGAUUUUCGUUUUUUU	Cleavage	1	LRR_receptor-like_kinase	AAGAGAACGAGAATCGGCGGC	21	Mitovirus1
466-226	AES75437	3	-1	1	21	831	851	AAGAGAACGAGAAUCGGCGGC	UUUGUUGUUUCUUGUUCUCUU	Cleavage	1	Kunitz_type_trypsin_inhibitor_/_Alpha-fucosidase	AAGAGAACGAGAATCGGCGGC	21	Mitovirus1
466-226	KEH34075	2	-1	1	21	645	665	AAGAGAACGAGAAUCGGCGGC	CAUGCUGAUUCUUGUUUUCUU	Cleavage	1	transmembrane_protein;_putative	AAGAGAACGAGAATCGGCGGC	21	Mitovirus1
466-226	KEH26152	3	-1	1	21	800	820	AAGAGAACGAGAAUCGGCGGC	UUUGUUGUUUCUUGUUCUCUU	Cleavage	1	Kunitz_type_trypsin_inhibitor_/_Alpha-fucosidase	AAGAGAACGAGAATCGGCGGC	21	Mitovirus1
466-226	AES94704	3	-1	1	21	127	147	AAGAGAACGAGAAUCGGCGGC	GUCGUUGGUUCUCGUUCUCGU	Cleavage	1	arginine/serine-rich_splicing_factor	AAGAGAACGAGAATCGGCGGC	21	Mitovirus1
472-224	AET02050	3	-1	1	21	1861	1881	UGGUUAACUCCUUGGCUAUCG	UCAUAUUCAAGAAGUUAACCA	Translation	1	signal_peptide_peptidase-like_protein	TGGTTAACTCCTTGGCTATCG	21	Mitovirus1
472-224	KEH36421	3	-1	1	21	1552	1572	UGGUUAACUCCUUGGCUAUCG	AUACAGUCAAGGAGUUAAACA	Cleavage	1	T-complex_protein	TGGTTAACTCCTTGGCTATCG	21	Mitovirus1
472-224	AES63246	3	-1	1	21	1539	1559	UGGUUAACUCCUUGGCUAUCG	AUACAGUCAAGGAGUUAAACA	Cleavage	1	T-complex_protein	TGGTTAACTCCTTGGCTATCG	21	Mitovirus1
472-224	KEH29187	3	-1	1	21	4379	4399	UGGUUAACUCCUUGGCUAUCG	GAAUGGUUAAGGAGUUGACUG	Cleavage	1	nucleotidyltransferase_family_protein	TGGTTAACTCCTTGGCTATCG	21	Mitovirus1
472-224	KEH22250	2.5	-1	1	21	62	82	UGGUUAACUCCUUGGCUAUCG	UGAGAACCAAGGAGUUGACCA	Cleavage	1	hypothetical_protein	TGGTTAACTCCTTGGCTATCG	21	Mitovirus1
472-224	AES94675	3	-1	1	21	4457	4477	UGGUUAACUCCUUGGCUAUCG	CGAUAGAGAAGGAGUUGAUCA	Cleavage	1	DNA_polymerase	TGGTTAACTCCTTGGCTATCG	21	Mitovirus1
472-224	KEH25561	3	-1	1	21	338	358	UGGUUAACUCCUUGGCUAUCG	AACUUGCUAAGGAGUUAACUA	Cleavage	1	cationic_amino_acid_transporter_2;_vacuolar_protein	TGGTTAACTCCTTGGCTATCG	21	Mitovirus1
472-224	AES73159	3	-1	1	21	2357	2377	UGGUUAACUCCUUGGCUAUCG	AAAUGGCCGAGGAGAUGACCA	Cleavage	1	-associated_kinesin_KIF4A-like_protein	TGGTTAACTCCTTGGCTATCG	21	Mitovirus1
472-224	AES98564	1.5	-1	1	21	1013	1033	UGGUUAACUCCUUGGCUAUCG	AAAUAAUCAAGGAGUUAACCA	Cleavage	1	cytochrome_P450_family-dependent_fatty_acid_hydroxylase	TGGTTAACTCCTTGGCTATCG	21	Mitovirus1
472-224	KEH18849	3	-1	1	21	2453	2473	UGGUUAACUCCUUGGCUAUCG	UCAUAUUCAAGAAGUUAACCA	Translation	1	signal_peptide_peptidase-like_protein	TGGTTAACTCCTTGGCTATCG	21	Mitovirus1
472-224	AES69622	2.5	-1	1	21	4317	4337	UGGUUAACUCCUUGGCUAUCG	UAAGAACCAAGGAGUUGACCA	Cleavage	1	hypothetical_protein	TGGTTAACTCCTTGGCTATCG	21	Mitovirus1
474-223	AES94831	3	-1	1	21	4039	4059	GAACGAGAAUCGGCGGCCUGC	UGAGGCUGCUGAUUCUGGUUU	Cleavage	1	histone-lysine_N-methyltransferase_SUVR5-like_protein	GAACGAGAATCGGCGGCCTGC	21	Mitovirus1
474-223	KEH44448	1.5	-1	1	21	160	180	GAACGAGAAUCGGCGGCCUGC	UGAUGCCGUCGAUUCUCGUUC	Cleavage	1	high_mobility_group_(HMG)-box_protein	GAACGAGAATCGGCGGCCTGC	21	Mitovirus1
474-223	AES94704	3	-1	1	21	123	143	GAACGAGAAUCGGCGGCCUGC	UCAAGUCGUUGGUUCUCGUUC	Cleavage	1	arginine/serine-rich_splicing_factor	GAACGAGAATCGGCGGCCTGC	21	Mitovirus1
474-223	AES63626	2.5	-1	1	21	2515	2535	GAACGAGAAUCGGCGGCCUGC	GAAGGCUUCUGAUUCUCGUUU	Cleavage	1	kinesin_motor_catalytic_domain_protein	GAACGAGAATCGGCGGCCTGC	21	Mitovirus1
50-1566	KEH40434	3	-1	1	21	1286	1306	ACGGGUCGGAAUCUUUGCUCA	AUAGCAAGGAUUCUGAUUCGA	Cleavage	1	hypothetical_protein	ACGGGTCGGAATCTTTGCTCA	21	Mitovirus1
50-1566	AES72528	2.5	-1	1	21	1520	1540	ACGGGUCGGAAUCUUUGCUCA	AGAGCAAAGAUUCUGGCUCGA	Cleavage	1	transmembrane_protein;_putative	ACGGGTCGGAATCTTTGCTCA	21	Mitovirus1
50-1566	KEH32705	3	-1	1	21	584	604	ACGGGUCGGAAUCUUUGCUCA	UUAAUAAAGGUUCUGAUCCGU	Cleavage	1	C2_and_GRAM_domain_plant-like_protein	ACGGGTCGGAATCTTTGCTCA	21	Mitovirus1
50-1566	KEH32688	2	-1	1	21	305	325	ACGGGUCGGAAUCUUUGCUCA	CAAGCAAAGAUUCCGACUUGC	Cleavage	1	galacturonosyltransferase	ACGGGTCGGAATCTTTGCTCA	21	Mitovirus1
513-205	KEH26629	3	-1	1	21	146	166	GUUUCACGUGACGGUCUGCCU	CCGCAGAGUGUCAUGUGGAAU	Cleavage	1	hypothetical_protein	GTTTCACGTGACGGTCTGCCT	21	Mitovirus1
513-205	AES76906	3	-1	1	21	146	166	GUUUCACGUGACGGUCUGCCU	CCGCAGAGUGUCAUGUGGAAU	Cleavage	1	hypothetical_protein	GTTTCACGTGACGGTCTGCCT	21	Mitovirus1
513-205	AES59766	2.5	-1	1	21	1102	1122	GUUUCACGUGACGGUCUGCCU	GAGCAGACCCUUAUGUGAAAC	Cleavage	1	calcium-dependent_lipid-binding_(CaLB_domain)_family_protein	GTTTCACGTGACGGTCTGCCT	21	Mitovirus1
513-205	AES80681	3	-1	1	21	2352	2372	GUUUCACGUGACGGUCUGCCU	AGGCAGAUUGUUACGUGGAAG	Cleavage	1	transport_inhibitor_response_1_protein	GTTTCACGTGACGGTCTGCCT	21	Mitovirus1
529-197	AES95311	3	-1	1	21	2330	2350	CACCGAUCCAGGUCCUCGGAU	AUUUGAGGAUCAGGAUCGGUG	Translation	1	PPR_containing_plant-like_protein	CACCGATCCAGGTCCTCGGAT	21	Mitovirus1
71-1269	AES89714	2.5	-1	1	21	421	441	GAGAACGAGAAUCGGCGGCCU	AAGGCGCUGAUUUUCGUUUUC	Cleavage	1	hypothetical_protein	GAGAACGAGAATCGGCGGCCT	21	Mitovirus1
71-1269	KEH28146	3	-1	1	21	95	115	GAGAACGAGAAUCGGCGGCCU	AAGAUGACGAUUUUCGUUCUC	Cleavage	1	zinc_finger_with_UFM1-specific_peptidase_domain_protein	GAGAACGAGAATCGGCGGCCT	21	Mitovirus1
71-1269	KEH44448	3	-1	1	21	162	182	GAGAACGAGAAUCGGCGGCCU	AUGCCGUCGAUUCUCGUUCCG	Cleavage	1	high_mobility_group_(HMG)-box_protein	GAGAACGAGAATCGGCGGCCT	21	Mitovirus1
71-1269	AES65756	3	-1	1	21	274	294	GAGAACGAGAAUCGGCGGCCU	GAGACGACGGUUUUCGUUCUC	Cleavage	1	cation-chloride_cotransporter	GAGAACGAGAATCGGCGGCCT	21	Mitovirus1
71-1269	AES94704	2	-1	1	21	125	145	GAGAACGAGAAUCGGCGGCCU	AAGUCGUUGGUUCUCGUUCUC	Cleavage	2	arginine/serine-rich_splicing_factor	GAGAACGAGAATCGGCGGCCT	21	Mitovirus1
71-1269	AES98449	3	-1	1	21	89	109	GAGAACGAGAAUCGGCGGCCU	AAGAUGACGAUUUUCGUUCUC	Cleavage	1	zinc_finger_with_UFM1-specific_peptidase_domain_protein	GAGAACGAGAATCGGCGGCCT	21	Mitovirus1
71-1269	KEH37821	3	-1	1	21	270	290	GAGAACGAGAAUCGGCGGCCU	GAGACGACGGUUUUCGUUCUC	Cleavage	1	cation-chloride_cotransporter	GAGAACGAGAATCGGCGGCCT	21	Mitovirus1
71-1269	AES70804	3	-1	1	21	489	509	GAGAACGAGAAUCGGCGGCCU	UUGCUACCGAUUCUCCUUCUC	Cleavage	1	hypothetical_protein	GAGAACGAGAATCGGCGGCCT	21	Mitovirus1
8-11161	AES94846	3	-1	1	21	2369	2389	CCGAGUGGAUACGUCGAGGCU	UCCUUCGUUGUAUUCACUUGG	Cleavage	1	PPR_containing_plant-like_protein	CCGAGTGGATACGTCGAGGCT	21	Mitovirus1
8-11161	KEH20221	3	-1	1	21	3968	3988	CCGAGUGGAUACGUCGAGGCU	GACCAAGACGUAUCUGCUCGG	Cleavage	1	phospholipid-transporting_ATPase-like_protein	CCGAGTGGATACGTCGAGGCT	21	Mitovirus1
127-387	AES68881	3	-1	1	21	51	71	ACAAGGAUUCCAACUCAGAAC	CCUCUUAGUUUGAAUUCUUGU	Translation	1	ubiquitin_ligase_SINAT3	ACAAGGATTCCAACTCAGAAC	21	Mitovirus2
127-387	KEH27421	3	-1	1	21	4104	4124	ACAAGGAUUCCAACUCAGAAC	AUGCUCAGUUGGAAUUUUUGU	Cleavage	1	cation/H+_exchanger_3	ACAAGGATTCCAACTCAGAAC	21	Mitovirus2
127-387	KEH32171	2	-1	1	21	380	400	ACAAGGAUUCCAACUCAGAAC	CACUUGAGUUGGAAUCUUUGU	Cleavage	1	transducin/WD-like_repeat-protein	ACAAGGATTCCAACTCAGAAC	21	Mitovirus2
127-387	AES94424	2.5	-1	1	21	596	616	ACAAGGAUUCCAACUCAGAAC	CAUCUGAAUUAGAAUCCUUGU	Translation	1	glycine_cleavage_system_H_protein	ACAAGGATTCCAACTCAGAAC	21	Mitovirus2
127-387	AES72333	3	-1	1	21	1161	1181	ACAAGGAUUCCAACUCAGAAC	GAACCGAGUUGGAAUUUUUGU	Cleavage	1	LRR_receptor-like_kinase_family_protein	ACAAGGATTCCAACTCAGAAC	21	Mitovirus2
127-387	AES93999	3	-1	1	21	3250	3270	ACAAGGAUUCCAACUCAGAAC	AUGCUCAGUUGGAAUUUUUGU	Cleavage	1	cation/H+_exchanger_3	ACAAGGATTCCAACTCAGAAC	21	Mitovirus2
127-387	AES94000	3	-1	1	21	2233	2253	ACAAGGAUUCCAACUCAGAAC	GUGCUCAGUUGGAAUUUUUGU	Cleavage	1	cation/H+_exchanger_3	ACAAGGATTCCAACTCAGAAC	21	Mitovirus2
127-387	AES69622	2.5	-1	1	21	4032	4052	ACAAGGAUUCCAACUCAGAAC	GGUCUAAGUUGGAAUCAUUGU	Cleavage	1	hypothetical_protein	ACAAGGATTCCAACTCAGAAC	21	Mitovirus2
127-387	AET04926	2.5	-1	1	21	1575	1595	ACAAGGAUUCCAACUCAGAAC	UCUCACAGUUGGAAUUCUUGU	Cleavage	1	Calnexin_2	ACAAGGATTCCAACTCAGAAC	21	Mitovirus2
127-387	KEH32170	3	-1	1	21	499	519	ACAAGGAUUCCAACUCAGAAC	CACUUGAGUUGGAAUCUUUGA	Cleavage	1	transducin/WD-like_repeat-protein	ACAAGGATTCCAACTCAGAAC	21	Mitovirus2
127-387	KEH33156	3	-1	1	21	180	200	ACAAGGAUUCCAACUCAGAAC	GGUCAAAGUUGGAGUCUUUGU	Cleavage	1	hypothetical_protein	ACAAGGATTCCAACTCAGAAC	21	Mitovirus2
127-387	AES94422	2.5	-1	1	21	558	578	ACAAGGAUUCCAACUCAGAAC	CAUCUGAAUUAGAAUCCUUGU	Translation	1	glycine_cleavage_system_H_protein	ACAAGGATTCCAACTCAGAAC	21	Mitovirus2
127-387	AES92725	3	-1	1	21	1172	1192	ACAAGGAUUCCAACUCAGAAC	UGUUUGUGUUGGAAGCCUUGU	Cleavage	1	F-box_and_associated_interaction_domain_protein	ACAAGGATTCCAACTCAGAAC	21	Mitovirus2
127-387	AES90472	2.5	-1	1	21	2025	2045	ACAAGGAUUCCAACUCAGAAC	UAUCUGCCUUGGAAUCUUUGU	Cleavage	1	G-type_lectin_S-receptor-like_Serine/Threonine-kinase	ACAAGGATTCCAACTCAGAAC	21	Mitovirus2
127-387	KEH20172	3	-1	1	21	299	319	ACAAGGAUUCCAACUCAGAAC	UUUCUGAGAUGGAAUACUUGU	Cleavage	1	PPR_containing_plant-like_protein	ACAAGGATTCCAACTCAGAAC	21	Mitovirus2
127-387	AES94002	3	-1	1	21	1749	1769	ACAAGGAUUCCAACUCAGAAC	AUGCUCAGUUGGAAUUUUUGU	Cleavage	1	cation/H+_exchanger_3	ACAAGGATTCCAACTCAGAAC	21	Mitovirus2
127-387	AET03186	3	-1	1	21	272	292	ACAAGGAUUCCAACUCAGAAC	UUUCUGAGAUGGAAUACUUGU	Cleavage	1	PPR_containing_plant-like_protein	ACAAGGATTCCAACTCAGAAC	21	Mitovirus2
127-387	KEH42430	3	-1	1	21	414	434	ACAAGGAUUCCAACUCAGAAC	GCUCUGAGGUGAAAUCCUUGU	Translation	1	glutaredoxin_C4	ACAAGGATTCCAACTCAGAAC	21	Mitovirus2
127-387	AET00919	3	-1	1	21	804	824	ACAAGGAUUCCAACUCAGAAC	UAUGUCAGUUGGAAUCCUUGG	Cleavage	1	cytokinin_receptor_histidine_kinase	ACAAGGATTCCAACTCAGAAC	21	Mitovirus2
148-319	AES71839	1.5	-1	1	21	351	371	UUGUAGAUCCUACCAACCCGA	AUGGGUUGGUAGGAUCUGCAU	Cleavage	1	hypothetical_protein	TTGTAGATCCTACCAACCCGA	21	Mitovirus2
148-319	AET05349	3	-1	1	21	1704	1724	UUGUAGAUCCUACCAACCCGA	CAUGGUUGGUAGGAUCUUUAA	Cleavage	1	CHY_zinc_finger_protein	TTGTAGATCCTACCAACCCGA	21	Mitovirus2
148-319	AES97093	3	-1	1	21	828	848	UUGUAGAUCCUACCAACCCGA	CUGGGUUGGUUGGAUUUGCAG	Translation	1	cytochrome_P450_family_protein	TTGTAGATCCTACCAACCCGA	21	Mitovirus2
148-319	KEH22902	3	-1	1	21	785	805	UUGUAGAUCCUACCAACCCGA	UUGUGUUGGUAGGGUCUAUGG	Cleavage	1	NAD(P)-binding_rossmann-fold_protein	TTGTAGATCCTACCAACCCGA	21	Mitovirus2
148-319	AES64663	3	-1	1	21	1432	1452	UUGUAGAUCCUACCAACCCGA	AUGGGUUGGUAAGAUAUACAA	Translation	1	elongation_factor_Tu_GTP-binding_domain_protein	TTGTAGATCCTACCAACCCGA	21	Mitovirus2
148-319	AES64672	2.5	-1	1	21	1631	1651	UUGUAGAUCCUACCAACCCGA	AGGGGUUAGUAGGAUAUACAA	Cleavage	1	elongation_factor_Tu_GTP-binding_domain_protein	TTGTAGATCCTACCAACCCGA	21	Mitovirus2
148-319	AES81362	3	-1	1	21	2706	2726	UUGUAGAUCCUACCAACCCGA	AAGGGUAGGUAGUAUCUAUAA	Cleavage	1	transmembrane_protein;_putative	TTGTAGATCCTACCAACCCGA	21	Mitovirus2
148-319	KEH21377	3	-1	1	21	984	1004	UUGUAGAUCCUACCAACCCGA	CAUGGUUGGUAGGAUCUUUAA	Cleavage	1	CHY_zinc_finger_protein	TTGTAGATCCTACCAACCCGA	21	Mitovirus2
164-289	AET01536	3	-1	1	21	286	306	CUAUUGUCCAGUACGCUGCCU	GGGUAUAGUACUGGACAAUGG	Cleavage	1	DNA_repair-like_proteinRadA	CTATTGTCCAGTACGCTGCCT	21	Mitovirus2
164-289	AES90193	3	-1	1	21	6804	6824	CUAUUGUCCAGUACGCUGCCU	GUGUAUUUUACUGGACAAUAG	Cleavage	1	autophagy_protein	CTATTGTCCAGTACGCTGCCT	21	Mitovirus2
164-289	AES72048	3	-1	1	21	350	370	CUAUUGUCCAGUACGCUGCCU	GUGUAGAGUACUGGAUGAUGG	Cleavage	1	exostosin-like_protein	CTATTGTCCAGTACGCTGCCT	21	Mitovirus2
32-1313	AES64217	2.5	-1	1	21	1111	1131	UCGAAAACCUCUGGCCUUGGC	UGCAAGACCAGAGGUUUUUGU	Cleavage	1	anaphase-promoting_complex_subunit_7	TCGAAAACCTCTGGCCTTGGC	21	Mitovirus2
32-1313	KEH22812	3	-1	1	21	123	143	UCGAAAACCUCUGGCCUUGGC	UACUAGGCCAGAUGUUUUUGA	Cleavage	1	hypothetical_protein	TCGAAAACCTCTGGCCTTGGC	21	Mitovirus2
32-1313	KEH22832	3	-1	1	21	1725	1745	UCGAAAACCUCUGGCCUUGGC	UACAAUGCUAGAGGUUUUGGA	Cleavage	1	LRR_receptor-like_kinase_family_protein	TCGAAAACCTCTGGCCTTGGC	21	Mitovirus2
32-1313	KEH34079	3	-1	1	21	3100	3120	UCGAAAACCUCUGGCCUUGGC	AGCAGGGCCACAGGUUUUUGG	Translation	1	RNA_recognition_motif	TCGAAAACCTCTGGCCTTGGC	21	Mitovirus2
111-504	AES60872	3	-1	1	21	271	291	UGAGGACUUGGAAUAUCCCGA	AAAGGAUAUUUUGAGUUCUCA	Cleavage	1	hypothetical_protein	TGAGGACTTGGAATATCCCGA	21	Mitovirus3
111-504	AES61342	3	-1	1	21	948	968	UGAGGACUUGGAAUAUCCCGA	CAGUGAUAUUCCAAUUCUUCA	Cleavage	1	Hus1_checkpoint_protein	TGAGGACTTGGAATATCCCGA	21	Mitovirus3
111-504	AES74097	2.5	-1	1	21	1809	1829	UGAGGACUUGGAAUAUCCCGA	UUUGGAUUUUCCAAGUUCUCA	Cleavage	1	F-box/kelch-repeat_plant_protein	TGAGGACTTGGAATATCCCGA	21	Mitovirus3
111-504	AES91581	3	-1	1	21	2506	2526	UGAGGACUUGGAAUAUCCCGA	UGAUGAGAUUCCAAGUCCUCA	Cleavage	1	beta-1;4-N-acetylglucosaminyltransferase-like_protein	TGAGGACTTGGAATATCCCGA	21	Mitovirus3
111-504	AES66086	3	-1	1	21	1482	1502	UGAGGACUUGGAAUAUCCCGA	UGGGGAUUUUCCAAGUCUUUU	Cleavage	1	NBS-LRR_type_disease_resistance_protein	TGAGGACTTGGAATATCCCGA	21	Mitovirus3
111-504	KEH37622	3	-1	1	21	627	647	UGAGGACUUGGAAUAUCCCGA	GAGAGAUAUUCCAAGUUUUCC	Cleavage	1	F-box_protein_interaction_domain_protein	TGAGGACTTGGAATATCCCGA	21	Mitovirus3
111-504	KEH22648	3	-1	1	21	639	659	UGAGGACUUGGAAUAUCCCGA	GAGAGAUAUUCCAAGUUUUCC	Cleavage	1	F-box_protein_interaction_domain_protein	TGAGGACTTGGAATATCCCGA	21	Mitovirus3
111-504	KEH30919	3	-1	1	21	1077	1097	UGAGGACUUGGAAUAUCCCGA	UUUGGAUAUUCAAAGUCCUCG	Translation	1	sucrose_nonfermenting_1(SNF1)-related_kinase	TGAGGACTTGGAATATCCCGA	21	Mitovirus3
111-504	KEH37623	3	-1	1	21	627	647	UGAGGACUUGGAAUAUCCCGA	GAAGGAUAUUCCAAGUUUUCC	Cleavage	1	F-box_protein_interaction_domain_protein	TGAGGACTTGGAATATCCCGA	21	Mitovirus3
111-504	KEH30920	3	-1	1	21	630	650	UGAGGACUUGGAAUAUCCCGA	UUUGGAUAUUCAAAGUCCUCG	Translation	1	sucrose_nonfermenting_1(SNF1)-related_kinase	TGAGGACTTGGAATATCCCGA	21	Mitovirus3
113-503	KEH15541	2	-1	1	21	587	607	UAGGAGCAAUCCUAGGCACUG	UCAUGCCUGGGAUUGUUCCUA	Cleavage	1	hypothetical_protein	TAGGAGCAATCCTAGGCACTG	21	Mitovirus3
113-503	KEH33731	2.5	-1	1	21	2275	2295	UAGGAGCAAUCCUAGGCACUG	UCAUGCCUGGGAUUGUUUCUA	Cleavage	1	NB-ARC_domain_disease_resistance_protein	TAGGAGCAATCCTAGGCACTG	21	Mitovirus3
113-503	KEH28655	3	-1	1	21	574	594	UAGGAGCAAUCCUAGGCACUG	AUGUGGCUGGGAUUGCUGCUA	Cleavage	1	ribonuclease_P	TAGGAGCAATCCTAGGCACTG	21	Mitovirus3
113-503	KEH17114	2.5	-1	1	21	2167	2187	UAGGAGCAAUCCUAGGCACUG	UCAUGCCUGGGAUUGUUUCUA	Cleavage	1	LRR_and_NB-ARC_domain_disease_resistance_protein	TAGGAGCAATCCTAGGCACTG	21	Mitovirus3
113-503	KEH33909	3	-1	1	21	1858	1878	UAGGAGCAAUCCUAGGCACUG	AUGGGUCUAGGAUUGCCCCUA	Cleavage	1	zinc_finger_CCCH-type_with_G_patch_domain_protein	TAGGAGCAATCCTAGGCACTG	21	Mitovirus3
113-503	KEH37811	3	-1	1	21	210	230	UAGGAGCAAUCCUAGGCACUG	CGGUGCUCAGGACUGCUCCUA	Cleavage	1	hypothetical_protein	TAGGAGCAATCCTAGGCACTG	21	Mitovirus3
113-503	AES70859	3	-1	1	21	2531	2551	UAGGAGCAAUCCUAGGCACUG	UGGUAUCUGGGAUUGUUCUUA	Cleavage	1	P-loop_nucleoside_triphosphate_hydrolase_superfamily_protein	TAGGAGCAATCCTAGGCACTG	21	Mitovirus3
113-503	AES71066	3	-1	1	21	621	641	UAGGAGCAAUCCUAGGCACUG	GGAUUCCUAGGAUUGUUCUUA	Cleavage	1	UDP-glucosyltransferase_family_protein	TAGGAGCAATCCTAGGCACTG	21	Mitovirus3
113-503	AES82250	3	-1	1	21	413	433	UAGGAGCAAUCCUAGGCACUG	GUGUGCACGGGAUUGCUUCUA	Cleavage	1	transducin/WD-like_repeat-protein	TAGGAGCAATCCTAGGCACTG	21	Mitovirus3
157-358	AES98591	3	-1	1	21	598	618	AAACGCGUGCUCGAAAGGCUG	AAGCCUUUGGAGUAUGUGUUU	Cleavage	1	damaged_DNA-binding_protein	AAACGCGTGCTCGAAAGGCTG	21	Mitovirus3
157-358	KEH28971	3	-1	1	21	244	264	AAACGCGUGCUCGAAAGGCUG	UUGCCAUUUGAUCACGCGUUU	Translation	1	linker_histone_H1_and_h5_family_protein	AAACGCGTGCTCGAAAGGCTG	21	Mitovirus3
183-294	AES73260	3	-1	1	21	1995	2015	UCUAUGACCUCGGCUGGGGCA	CACCCCAUCCAAGGUCAUGGA	Translation	1	polyadenylate-binding_protein_RBP47C	TCTATGACCTCGGCTGGGGCA	21	Mitovirus3
183-294	KEH30847	2	-1	1	21	1932	1952	UCUAUGACCUCGGCUGGGGCA	CCCUCUUGCCGAGGUCAUAGA	Cleavage	1	sulfate/bicarbonate/oxalate_exchanger_and_transporter_sat-1	TCTATGACCTCGGCTGGGGCA	21	Mitovirus3
183-294	AES98081	2.5	-1	1	21	3086	3106	UCUAUGACCUCGGCUGGGGCA	AGUUCCAGCAGAGGUCAUAGA	Cleavage	1	outer_arm_dynein_light_chain_1	TCTATGACCTCGGCTGGGGCA	21	Mitovirus3
183-294	KEH44376	3	-1	1	21	60	80	UCUAUGACCUCGGCUGGGGCA	UGCCUCAGCCGGGCUUAUAGA	Cleavage	1	DNA-binding_protein	TCTATGACCTCGGCTGGGGCA	21	Mitovirus3
252-224	AES59449	3	-1	1	21	103	123	AUGAGGACUUGGAAUAUCCCG	AUGGAUGUUUCAAAUCUUCAU	Cleavage	1	UDP-glucuronate	ATGAGGACTTGGAATATCCCG	21	Mitovirus3
252-224	KEH25436	3	-1	1	21	983	1003	AUGAGGACUUGGAAUAUCCCG	GCGGAGGAUCCAAGUCCUUAU	Cleavage	1	glucose-6-phosphate_1-dehydrogenase	ATGAGGACTTGGAATATCCCG	21	Mitovirus3
252-224	KEH27540	3	-1	1	21	600	620	AUGAGGACUUGGAAUAUCCCG	UUGGAUACUCCAAGUCUUCGG	Cleavage	1	sucrose_nonfermenting_1(SNF1)-related_kinase	ATGAGGACTTGGAATATCCCG	21	Mitovirus3
252-224	AES59448	3	-1	1	21	161	181	AUGAGGACUUGGAAUAUCCCG	AUGGAUGUUUCAAAUCUUCAU	Cleavage	1	UDP-glucuronate	ATGAGGACTTGGAATATCCCG	21	Mitovirus3
252-224	AES94762	3	-1	1	21	714	734	AUGAGGACUUGGAAUAUCCCG	UUGGAUACUCCAAGUCUUCGG	Cleavage	1	sucrose_nonfermenting_1(SNF1)-related_kinase	ATGAGGACTTGGAATATCCCG	21	Mitovirus3
252-224	AES97113	3	-1	1	21	1141	1161	AUGAGGACUUGGAAUAUCCCG	AAGGAUUUUUCAAGUCAUCAU	Cleavage	1	ureide_permease-like_protein	ATGAGGACTTGGAATATCCCG	21	Mitovirus3
252-224	KEH35249	3	-1	1	21	1039	1059	AUGAGGACUUGGAAUAUCCCG	UGGAAUCAUCCAAGUCCUCAU	Cleavage	1	calmodulin-binding_protein	ATGAGGACTTGGAATATCCCG	21	Mitovirus3
252-224	KEH39034	2.5	-1	1	21	1943	1963	AUGAGGACUUGGAAUAUCCCG	UACGAUAUUUCAAGUUUUCAU	Cleavage	1	anthocyanin_5-aromatic_acyltransferase	ATGAGGACTTGGAATATCCCG	21	Mitovirus3
252-224	KEH30919	3	-1	1	21	1078	1098	AUGAGGACUUGGAAUAUCCCG	UUGGAUAUUCAAAGUCCUCGG	Translation	1	sucrose_nonfermenting_1(SNF1)-related_kinase	ATGAGGACTTGGAATATCCCG	21	Mitovirus3
252-224	KEH42796	3	-1	1	21	3677	3697	AUGAGGACUUGGAAUAUCCCG	AACGUUAUUCUAAGUCUUCAU	Cleavage	1	E3_ubiquitin_ligase_PUB14;_putative	ATGAGGACTTGGAATATCCCG	21	Mitovirus3
252-224	AES61342	3	-1	1	21	949	969	AUGAGGACUUGGAAUAUCCCG	AGUGAUAUUCCAAUUCUUCAU	Cleavage	1	Hus1_checkpoint_protein	ATGAGGACTTGGAATATCCCG	21	Mitovirus3
252-224	KEH37623	2.5	-1	1	21	628	648	AUGAGGACUUGGAAUAUCCCG	AAGGAUAUUCCAAGUUUUCCU	Cleavage	1	F-box_protein_interaction_domain_protein	ATGAGGACTTGGAATATCCCG	21	Mitovirus3
252-224	KEH30920	3	-1	1	21	631	651	AUGAGGACUUGGAAUAUCCCG	UUGGAUAUUCAAAGUCCUCGG	Translation	1	sucrose_nonfermenting_1(SNF1)-related_kinase	ATGAGGACTTGGAATATCCCG	21	Mitovirus3
252-224	KEH27541	3	-1	1	21	729	749	AUGAGGACUUGGAAUAUCCCG	UUGGAUACUCCAAGUCUUCGG	Cleavage	1	sucrose_nonfermenting_1(SNF1)-related_kinase	ATGAGGACTTGGAATATCCCG	21	Mitovirus3
252-224	AES72007	3	-1	1	21	1039	1059	AUGAGGACUUGGAAUAUCCCG	UGGAAUCAUCCAAGUCCUCAU	Cleavage	1	calmodulin-binding_protein	ATGAGGACTTGGAATATCCCG	21	Mitovirus3
252-224	KEH27868	3	-1	1	21	679	699	AUGAGGACUUGGAAUAUCCCG	AAGGAUUUUUCAAGUCAUCAU	Cleavage	1	ureide_permease-like_protein	ATGAGGACTTGGAATATCCCG	21	Mitovirus3
252-224	AES60872	2	-1	1	21	272	292	AUGAGGACUUGGAAUAUCCCG	AAGGAUAUUUUGAGUUCUCAU	Cleavage	1	hypothetical_protein	ATGAGGACTTGGAATATCCCG	21	Mitovirus3
252-224	AES91581	2	-1	1	21	2507	2527	AUGAGGACUUGGAAUAUCCCG	GAUGAGAUUCCAAGUCCUCAU	Cleavage	1	beta-1;4-N-acetylglucosaminyltransferase-like_protein	ATGAGGACTTGGAATATCCCG	21	Mitovirus3
252-224	AES74097	2.5	-1	1	21	1810	1830	AUGAGGACUUGGAAUAUCCCG	UUGGAUUUUCCAAGUUCUCAA	Cleavage	1	F-box/kelch-repeat_plant_protein	ATGAGGACTTGGAATATCCCG	21	Mitovirus3
270-212	AES74652	3	-1	1	21	230	250	CAGGUAGAAUCCACGAACUCC	GCAGAUGGUGGAUUCUACCUU	Cleavage	1	pathogenesis-related_thaumatin_family_protein	CAGGTAGAATCCACGAACTCC	21	Mitovirus3
270-212	KEH31489	3	-1	1	21	1950	1970	CAGGUAGAAUCCACGAACUCC	AGGGUUCGUGGAUUUUACUGG	Cleavage	1	LRR_receptor-like_kinase	CAGGTAGAATCCACGAACTCC	21	Mitovirus3
284-201	AET01956	2.5	-1	1	21	1021	1041	CUCUCUAGAUCUGGAACGCUU	UGGCCUUCCGGAUUUGGAGAG	Cleavage	1	26S_proteasome_regulatory_complex_protein	CTCTCTAGATCTGGAACGCTT	21	Mitovirus3
284-201	AES58865	3	-1	1	21	665	685	CUCUCUAGAUCUGGAACGCUU	UUGCGUUUCGGGUUUGGGGAG	Cleavage	1	nucleotide-diphospho-sugar_transferase-like_protein	CTCTCTAGATCTGGAACGCTT	21	Mitovirus3
284-201	KEH40913	3	-1	1	21	775	795	CUCUCUAGAUCUGGAACGCUU	AAUCUUUUCAGGUCUAGAGAG	Cleavage	1	enhancer_OF_AG-4-like_protein;_putative	CTCTCTAGATCTGGAACGCTT	21	Mitovirus3
284-201	AES72124	3	-1	1	21	705	725	CUCUCUAGAUCUGGAACGCUU	UGCUGUUGCGGAUCUAGAGAG	Cleavage	1	TCP-1/cpn60_chaperonin_family_protein	CTCTCTAGATCTGGAACGCTT	21	Mitovirus3
284-201	KEH18475	3	-1	1	21	181	201	CUCUCUAGAUCUGGAACGCUU	CCACGUUGCAGAUCUAGAGAC	Cleavage	1	hypothetical_protein	CTCTCTAGATCTGGAACGCTT	21	Mitovirus3
289-199	KEH39885	3	-1	1	21	1212	1232	CUCUGACGGUAGACUGAUCCU	UAGAUCAGUUUACUGUUAAAG	Cleavage	1	ubiquitin_carboxy-terminal_hydrolase	CTCTGACGGTAGACTGATCCT	21	Mitovirus3
289-199	AES72308	3	-1	1	21	1156	1176	CUCUGACGGUAGACUGAUCCU	GAGAUCCGUGUGCCGUCAGAG	Cleavage	1	SWI/SNF_complex_protein	CTCTGACGGTAGACTGATCCT	21	Mitovirus3
49-1016	AES77532	3	-1	1	21	592	612	CGUGGAAGAUGUAGAGGCCCU	UUGACUUCUACGUCUUCCACA	Cleavage	1	copalyldiphosphate_synthase	CGTGGAAGATGTAGAGGCCCT	21	Mitovirus3
49-1016	AES63927	2	-1	1	21	204	224	CGUGGAAGAUGUAGAGGCCCU	CAGCUUUCUACAUCUUCCACG	Cleavage	1	ribosomal_protein_L31	CGTGGAAGATGTAGAGGCCCT	21	Mitovirus3
49-1016	KEH34991	2.5	-1	1	21	284	304	CGUGGAAGAUGUAGAGGCCCU	UCGGCUUCAGCAUCUUCCACG	Cleavage	1	haloacid_dehalogenase-like_hydrolase	CGTGGAAGATGTAGAGGCCCT	21	Mitovirus3
49-1016	KEH24409	3	-1	1	21	274	294	CGUGGAAGAUGUAGAGGCCCU	AUGGCUUCUGCACCUUCCAUG	Cleavage	1	RelA-SpoT-like_protein_RSH1	CGTGGAAGATGTAGAGGCCCT	21	Mitovirus3
49-1016	KEH39066	3	-1	1	21	427	447	CGUGGAAGAUGUAGAGGCCCU	UUGGUCUCUACAUUUUACGCG	Cleavage	1	TIC_protein_20-IV;_related_protein	CGTGGAAGATGTAGAGGCCCT	21	Mitovirus3
49-1016	AES69216	2.5	-1	1	21	179	199	CGUGGAAGAUGUAGAGGCCCU	AUGGCCACUAUAUUUUCCAUG	Cleavage	1	anaphase-promoting_complex_subunit_11_RING-H2_finger_protein	CGTGGAAGATGTAGAGGCCCT	21	Mitovirus3
49-1016	KEH24410	3	-1	1	21	244	264	CGUGGAAGAUGUAGAGGCCCU	AUGGCUUCUGCACCUUCCAUG	Cleavage	1	RelA-SpoT-like_protein_RSH1	CGTGGAAGATGTAGAGGCCCT	21	Mitovirus3
53-971	AES87136	3	-1	1	21	24	44	UCUCUCUAGAUCUGGAACGCU	AACGUUGCAGAUCUGGAGACA	Cleavage	1	transmembrane_protein;_putative	TCTCTCTAGATCTGGAACGCT	21	Mitovirus3
53-971	AES61737	3	-1	1	21	490	510	UCUCUCUAGAUCUGGAACGCU	CCCGUUCCAGAGAUAGAGAGA	Translation	1	pollen_Ole_e_I_family_allergen	TCTCTCTAGATCTGGAACGCT	21	Mitovirus3
53-971	AES72124	2.5	-1	1	21	706	726	UCUCUCUAGAUCUGGAACGCU	GCUGUUGCGGAUCUAGAGAGG	Cleavage	1	TCP-1/cpn60_chaperonin_family_protein	TCTCTCTAGATCTGGAACGCT	21	Mitovirus3
53-971	KEH39872	3	-1	1	21	725	745	UCUCUCUAGAUCUGGAACGCU	UUCGUUCUAGGUCUAGGAAGA	Cleavage	1	chromatin_remodeling_factor_CHD3_(pickle)	TCTCTCTAGATCTGGAACGCT	21	Mitovirus3
53-971	AES95149	3	-1	1	21	160	180	UCUCUCUAGAUCUGGAACGCU	AACGUUGCAGAUCUGGAGACA	Cleavage	1	hypothetical_protein	TCTCTCTAGATCTGGAACGCT	21	Mitovirus3
53-971	KEH40913	2	-1	1	21	776	796	UCUCUCUAGAUCUGGAACGCU	AUCUUUUCAGGUCUAGAGAGA	Cleavage	1	enhancer_OF_AG-4-like_protein;_putative	TCTCTCTAGATCTGGAACGCT	21	Mitovirus3
53-971	AES77189	3	-1	1	21	18	38	UCUCUCUAGAUCUGGAACGCU	CACGUUGCAGAUCUGGAGACA	Cleavage	1	transmembrane_protein;_putative	TCTCTCTAGATCTGGAACGCT	21	Mitovirus3
53-971	KEH18475	2.5	-1	1	21	182	202	UCUCUCUAGAUCUGGAACGCU	CACGUUGCAGAUCUAGAGACA	Cleavage	1	hypothetical_protein	TCTCTCTAGATCTGGAACGCT	21	Mitovirus3
63-865	KEH15657	3	-1	1	21	816	836	AUCCUAGGCACUGUAGGGCCU	AAGCUUAAUAGUGUCUAGGAU	Cleavage	1	hypothetical_protein	ATCCTAGGCACTGTAGGGCCT	21	Mitovirus3
63-865	AES98699	3	-1	1	21	1134	1154	AUCCUAGGCACUGUAGGGCCU	AAGCUUAAUAGUGUCUAGGAU	Cleavage	1	hypothetical_protein	ATCCTAGGCACTGTAGGGCCT	21	Mitovirus3
63-865	AES92540	3	-1	1	21	1122	1142	AUCCUAGGCACUGUAGGGCCU	AAGCUUAAUAGUGUCUAGGAU	Cleavage	1	hypothetical_protein	ATCCTAGGCACTGTAGGGCCT	21	Mitovirus3
63-865	KEH30454	3	-1	1	21	1134	1154	AUCCUAGGCACUGUAGGGCCU	AAGCUUAAUAGUGUCUAGGAU	Cleavage	1	hypothetical_protein	ATCCTAGGCACTGTAGGGCCT	21	Mitovirus3
63-865	AES70817	3	-1	1	21	1122	1142	AUCCUAGGCACUGUAGGGCCU	AAGCUUAAUAGUGUCUAGGAU	Cleavage	1	hypothetical_protein	ATCCTAGGCACTGTAGGGCCT	21	Mitovirus3
63-865	AES97742	3	-1	1	21	1134	1154	AUCCUAGGCACUGUAGGGCCU	AAGCUUAAUAGUGUCUAGGAU	Cleavage	1	hypothetical_protein	ATCCTAGGCACTGTAGGGCCT	21	Mitovirus3
63-865	KEH26316	3	-1	1	21	1035	1055	AUCCUAGGCACUGUAGGGCCU	AAGCUUAAUAGUGUCUAGGAU	Cleavage	1	hypothetical_protein	ATCCTAGGCACTGTAGGGCCT	21	Mitovirus3
63-865	AES78759	3	-1	1	21	1089	1109	AUCCUAGGCACUGUAGGGCCU	AAGCUUAAUAGUGUCUAGGAU	Cleavage	1	hypothetical_protein	ATCCTAGGCACTGTAGGGCCT	21	Mitovirus3
63-865	KEH17267	3	-1	1	21	1077	1097	AUCCUAGGCACUGUAGGGCCU	AAGCUUAAUAGUGUCUAGGAU	Cleavage	1	hypothetical_protein	ATCCTAGGCACTGTAGGGCCT	21	Mitovirus3
82-692	KEH26212	2.5	-1	1	21	839	859	CUUCACCGUAUGGACUGGCCU	UGGCUAGACCAUGUGGUGAAG	Cleavage	1	tRNA_methyltransferase_complex_GCD14_subunit	CTTCACCGTATGGACTGGCCT	21	Mitovirus3
82-692	KEH26213	2.5	-1	1	21	1986	2006	CUUCACCGUAUGGACUGGCCU	UGGCUAGACCAUGUGGUGAAG	Cleavage	1	tRNA_methyltransferase_complex_GCD14_subunit	CTTCACCGTATGGACTGGCCT	21	Mitovirus3
99-545	AES87332	3	-1	1	21	2745	2765	GCGUAUACAGACCGGGAGACU	UUUCUCCCAGUUUGUAUAUGU	Cleavage	1	exocyst_complex_subunit_SEC6;_putative	GCGTATACAGACCGGGAGACT	21	Mitovirus3
25-889	AES64298	3	-1	1	21	1291	1311	CUACACUACUUCUGAAAGCCU	ACUCUUUCACAAGUGGUGUAG	Cleavage	1	inosine-uridine_preferring_nucleoside_hydrolase	CTACACTACTTCTGAAAGCCT	21	Mitovirus4
25-889	KEH23783	2.5	-1	1	21	1256	1276	CUACACUACUUCUGAAAGCCU	UAGCUUUCAGUAGUGGUGUGG	Translation	1	hypothetical_protein	CTACACTACTTCTGAAAGCCT	21	Mitovirus4
25-889	KEH36723	3	-1	1	21	839	859	CUACACUACUUCUGAAAGCCU	ACUCUUUCACAAGUGGUGUAG	Cleavage	1	inosine-uridine_preferring_nucleoside_hydrolase	CTACACTACTTCTGAAAGCCT	21	Mitovirus4
25-889	KEH36722	3	-1	1	21	1193	1213	CUACACUACUUCUGAAAGCCU	ACUCUUUCACAAGUGGUGUAG	Cleavage	1	inosine-uridine_preferring_nucleoside_hydrolase	CTACACTACTTCTGAAAGCCT	21	Mitovirus4
25-889	KEH31223	2.5	-1	1	21	1397	1417	CUACACUACUUCUGAAAGCCU	GAGCUGGUAGAAGUAGUGUAG	Cleavage	1	copper-transporting_ATPase_PAA1;_putative	CTACACTACTTCTGAAAGCCT	21	Mitovirus4
65-322	AES62431	3	-1	1	21	643	663	UGUUGGCCAAAUGAGAGAUUG	GACUCACUCAUUUGGCUAAUA	Cleavage	1	white-brown-complex_ABC_transporter_family_protein	TGTTGGCCAAATGAGAGATTG	21	Mitovirus4
65-322	AES63406	2	-1	1	21	343	363	UGUUGGCCAAAUGAGAGAUUG	CCAUUUUUCAUUUGGUCAACG	Cleavage	1	somatic_embryogenesis_receptor-like_kinase	TGTTGGCCAAATGAGAGATTG	21	Mitovirus4
65-322	AES98167	2	-1	1	21	196	216	UGUUGGCCAAAUGAGAGAUUG	CAAUUUCUCAUAUGGCCAACA	Translation	1	cysteine-rich_receptor-kinase-like_protein	TGTTGGCCAAATGAGAGATTG	21	Mitovirus4
65-322	AES99980	3	-1	1	21	6	26	UGUUGGCCAAAUGAGAGAUUG	UGAUUUCUUGUUUGGUCAACC	Cleavage	1	tousled-like_kinase_2	TGTTGGCCAAATGAGAGATTG	21	Mitovirus4
65-322	AET05031	3	-1	1	21	1912	1932	UGUUGGCCAAAUGAGAGAUUG	AAACCUUUCAUUUGUCCAACA	Cleavage	1	GAGA-binding_transcriptional_activator_BBR/BPC6-like_protein	TGTTGGCCAAATGAGAGATTG	21	Mitovirus4
65-322	AES86542	3	-1	1	21	491	511	UGUUGGCCAAAUGAGAGAUUG	UUAGUUUUUGUUUGGCCAACA	Cleavage	1	topless-like_protein	TGTTGGCCAAATGAGAGATTG	21	Mitovirus4
65-322	AES98340	2.5	-1	1	21	434	454	UGUUGGCCAAAUGAGAGAUUG	GACUCUCUUGUUUGGUCAACA	Cleavage	1	Serine/Threonine_kinase_family_protein	TGTTGGCCAAATGAGAGATTG	21	Mitovirus4
65-322	KEH29226	3	-1	1	21	2209	2229	UGUUGGCCAAAUGAGAGAUUG	CAAUCUCUCUUUUGGUUAACG	Cleavage	1	zinc_finger;_C3HC4_type_(RING_finger)_protein	TGTTGGCCAAATGAGAGATTG	21	Mitovirus4
65-322	KEH18009	3	-1	1	21	187	207	UGUUGGCCAAAUGAGAGAUUG	GUGUCUCGCAUUUUGCCAACA	Cleavage	1	transmembrane_protein;_putative	TGTTGGCCAAATGAGAGATTG	21	Mitovirus4
65-322	KEH28659	2.5	-1	1	21	882	901	UGUUGGCCAAAUGAGAGAUUG	GCGUCUC-CAUUUGGCCAACA	Cleavage	1	F-box/LRR_protein;_putative	TGTTGGCCAAATGAGAGATTG	21	Mitovirus4
